# Supplementary material
Source: publisher figshare collection journal article supplement (https://gsapubs.figshare.com/articles/dataset/_/26376121)
Supplement: Supplementary file 1 [file 1]

## Sheet: Jamaica_Kingston_All_Basins_Mar
Basin				Unmodelled (BP)					Modelled (BP)
	Core ID	Interval (cm)	C-14 Age	median	from_68_3	to_68_3	from_95_4	to_95_4	median	from_68_3	to_68_3	from_95_4	to_95_4
Kingston	10	0-1	680+25	295	401	226	454	126	305	406	239	458	135
Kingston	10	11-12	995+20	565	625	510	674	449	571	630	516	680	453
Kingston	9	4.5-5.5	1120+25	663	731	596	795	526	670	740	604	805	531
Kingston	11	6-7	1150+20	690	759	629	832	548	696	764	634	842	553
E Jamaica	42	6-7	1380+20	913	988	827	1065	753	923	1000	839	1076	762
Morant	1	0-1	1460+15	1000	1067	921	1162	856	1007	1076	927	1169	863
Navassa	13	0-1	1460+20	1010	1079	928	1171	865	1018	1091	938	1176	871
E Jamaica	42	41-42	1510+15	1051	1125	969	1208	908	1061	1136	976	1220	917
Navassa	16	0-1	1620+15	1168	1250	1100	1295	1014	1179	1258	1114	1305	1025
Kingston	10	26-27	1680+20	1224	1295	1160	1351	1072	1235	1302	1168	1365	1083
Kingston	9	9-10	1680+20	1224	1295	1160	1351	1072	1235	1302	1168	1365	1084
E Jamaica	42	61-62	1860+30	1405	1483	1328	1559	1265	1412	1493	1336	1568	1270
E Jamaica	42	56-57	1880+15	1424	1499	1354	1567	1286	1432	1507	1361	1577	1291
Navassa	20	0-1	2180+15	1772	1855	1695	1934	1605	1782	1863	1702	1943	1612
Morant	2	0-1	2290+20	1904	1989	1819	2076	1733	1916	1997	1826	2088	1743
Matley	27	25-26b	2300+15	1917	1995	1829	2086	1748	1928	2008	1836	2100	1758
Matley	27	25-26p	2320+15	1942	2029	1859	2113	1775	1953	2040	1869	2123	1785
Navassa	20	9-10	2470+15	2136	2235	2045	2306	1974	2148	2246	2061	2312	1982
Kingston	10	38-39	2470+20	2136	2235	2045	2309	1969	2148	2249	2059	2315	1979
Kingston	9	16-17	2720+20	2450	2531	2343	2658	2300	2459	2541	2346	2663	2305
Kingston	10	45-46	2840+25	2598	2698	2518	2747	2408	2615	2711	2535	2760	2419
Morant	5	47-48	3350+20	3216	3315	3140	3375	3039	3228	3323	3151	3385	3050
Kingston	9	19-20	3600+25	3508	3590	3419	3684	3351	3516	3605	3433	3690	3355
Matley*	27	54-55p	3690+20	3618	3706	3525	3807	3452	3630	3720	3535	3815	3460
Matley*	27	54-55b	3750+20	3698	3800	3615	3875	3515	3710	3810	3625	3887	3529
Matley*	30	17-18p	3780+20	3736	3826	3647	3911	3555	3748	3838	3658	3924	3564
Matley*	30	17-18b	3790+20	3749	3838	3659	3924	3565	3760	3853	3674	3941	3577
Morant*	MC05	22-23p	3850+20	3827	3912	3727	4005	3635	3840	3929	3740	4026	3648
Morant	MC01	24-25p	3890+20	3881	3977	3792	4069	3699	3893	3988	3803	4076	3706
Kingston	9	30-31	3920+25	3921	4012	3825	4106	3721	3932	4027	3836	4127	3742
Navassa	20	15-16	3970+20	3987	4076	3895	4175	3810	3998	4086	3901	4189	3818
Morant*	MC05	22-23p	4110+20	4176	4272	4080	4369	3985	4188	4282	4089	4381	3998
Morant	1	10-11	4160+20	4243	4339	4149	4420	4059	4255	4350	4157	4430	4065
Kingston	11	31-32	4160+25	4243	4339	4149	4420	4059	4255	4350	4157	4430	4065
Navassa	20	21-22	4370+20	4517	4605	4416	4727	4328	4528	4615	4423	4762	4345
Morant*	MC01	24-25p	4390+20	4545	4630	4435	4769	4375	4555	4642	4441	4775	4386
Morant	1	20-21	4570+20	4764	4852	4678	4945	4575	4780	4865	4687	4960	4586
Morant^	5	8-9	4600+20	4806	4888	4705	4986	4606	4819	4905	4720	5002	4623
Navassa	16	26-27	4660+20	4884	4971	4801	5077	4690	4891	4976	4806	5088	4699
Morant*	MC05	28-29p	4730+20	4967	5045	4855	5197	4810	4975	5055	4858	5204	4815
Morant *	MC05	28-29b	4740+20	4980	5058	4860	5206	4818	4989	5071	4866	5213	4823
Kingston	9	43-44	4890+30	5172	5278	5076	5359	4952	5187	5292	5090	5387	4971
Moarant	MC01	30-31	4990+25	5306	5417	5230	5474	5090	5317	5425	5244	5484	5102
Navassa	16	34-35	5260+20	5587	5660	5496	5753	5426	5596	5677	5513	5761	5433
Navassa	13	40-41	5480+25	5818	5904	5735	5985	5645	5830	5912	5743	5994	5649
Morant	1	24-25	5610+20	5971	6063	5887	6164	5800	5979	6066	5893	6170	5811
Navasa	13	47-48	6170+25	6563	6652	6476	6736	6390	6574	6660	6483	6745	6395
Kingston	9	62-63	6210+30	6608	6701	6515	6787	6424	6619	6715	6530	6798	6430
Navassa	20	37-38	6400+25	6826	6918	6736	7006	6646	6836	6926	6745	7018	6652
Navassa	16	45-46	6490+25	6932	7026	6832	7134	6755	6942	7038	6843	7141	6768
Morant	1	30-31	6500+30	6944	7041	6844	7143	6764	6955	7055	6855	7149	6773
Kingston	11	53-54	6760+35	7226	7313	7150	7402	7053	7236	7318	7155	7407	7065
Navassa	16	52-53	7080+25	7519	7583	7445	7663	7383	7527	7593	7453	7670	7391
Navassa	20	40-41	7360+25	7785	7860	7701	7935	7635	7794	7870	7710	7944	7644
Navassa	13	62-63	7850+35	8290	8366	8211	8445	8125	8301	8376	8220	8460	8135
Kingston	11	64-65	8560+40	9186	9289	9082	9385	9000	9198	9300	9090	9392	9008
Navassa	20	50-51	8850+35	9506	9578	9425	9690	9342	9513	9589	9431	9701	9354
Navassa	16	65-66	9000+55	9690	9777	9557	9909	9505	9699	9793	9566	9923	9510
Navassa	13	75-76	9910+40	10964	11095	10853	11169	10737	10984	11111	10870	11180	10752
Table S1. Radiocarbon and calibrated ages in ky B.P. obtained from the upper 1 m of the cores: C-14 ages, unmodelled and modelled: median and sigma 68+3 and 95+4. In bold identical C-14 ages. p=planktonic, b= benthic obtained *from the same interval. . Colors identify 12 groups and match those of Figures 3, 4, S1 and S2 EDs groups. There are four main types of groupings: 1. the 1692 historical ea…
